# Supplementary material
Source: publisher figshare collection journal article supplement (https://acs.figshare.com/ndownloader/files/4182016)
Supplement: Supplementary file 1 [file 4182016]

 
data_m10ba 

_audit_update_record
;
2011-10-30 # Formatted by publCIF
;
 
_audit_creation_method            SHELXL-97 
_chemical_name_systematic 
; 
 ? 
; 
#------------------------------------------------------------------------------ 
  
_publ_contact_author 
; 
    Subrata Mukhopadhyay 
; 
  
loop_ 
_publ_author_name 
_publ_author_address 
' FIRST AUTHORS NAME ' 
; 
  FIRST AUTHORS ADDRESS 
; 
  
_publ_section_title 
;
ENTER SECTION TITLE   Anion Induced Formation of Supramolecular Associations
Involving lone pair--\p and Anion--\p Interactions in Co(II) Malonate
Complexes: Experimental Observations, Hirshfeld Surface Analyses and DFT
Studies 
; 
  
_publ_section_abstract 
;
ENTER ABSTRACT
; 
  
_publ_section_exptl_prep 
;
ENTER EXPERIMENTAL SECTION
; 
  
_publ_section_exptl_refinement 
;
The structure was solved by the direct methods and there is half the Co complex
and two amino pyridimium and a nitrate ion in the asymmetric unit. All non-H
atoms were refined anisotropically. H atoms bonded to C were included in
calculated positions. Those bonded to N and O were found by difference Fourier
techniques and refined isotropically.
; 
  
_publ_section_comment 
;
ENTER TEXT
; 
  
_publ_section_references 
;
Bruker (2001). <i>SMART</i> (Version 5.625), <i>SADABS</i> (Version 2.03a) and
<i>SHELXTL</i> (Version 6.12). Bruker AXS Inc., Madison, Wisconsin, USA.

Bruker (2002). <i>SAINT</i>. Version 6.36a. Bruker AXS Inc., Madison,
Wisconsin, USA.

M. C. Burla, R. Caliandro, M. Camalli, B. Carrozzini, G. L. Cascarano, L. De
Caro,C. Giacovazzo, G. Polidori and R. Spagna <i>SIR2004</i>: an improved tool
for crystal structure determination and refinement J. Appl. Cryst. (2005). 38,
381-388

Sheldrick, G. M. (1997). <i>SHELXS97</i> and <i>SHELXL97</i>. University of
G\"ottingen, Germany.

Sheldrick, G. M. (2005). CELL_NOW. University of G\"ottingen, Germany.

Sheldrick, G. M. (2007). TWINABS. University of G\"ottingen, Germany.

Spek, A. L. (2003). <i>J. Appl. Cryst.</i> <b>36</b>, 2003, 7--13.
; 
  
_chemical_name_common             ? 
_chemical_melting_point           ? 
_chemical_formula_moiety 'C6 H8 Co O10, 4(C5 H7 N2), 2(N O3)'
_chemical_formula_sum 
 'C26 H36 Co N10 O16' 
_chemical_formula_weight          803.58 
  
loop_ 
 _atom_type_symbol 
 _atom_type_description 
 _atom_type_scat_dispersion_real 
 _atom_type_scat_dispersion_imag 
 _atom_type_scat_source 
 'C'  'C'   0.0033   0.0016 
 'International Tables Vol C Tables 4.2.6.8 and 6.1.1.4' 
 'H'  'H'   0.0000   0.0000 
 'International Tables Vol C Tables 4.2.6.8 and 6.1.1.4' 
 'N'  'N'   0.0061   0.0033 
 'International Tables Vol C Tables 4.2.6.8 and 6.1.1.4' 
 'O'  'O'   0.0106   0.0060 
 'International Tables Vol C Tables 4.2.6.8 and 6.1.1.4' 
 'Co'  'Co'   0.3494   0.9721 
 'International Tables Vol C Tables 4.2.6.8 and 6.1.1.4' 
  
_symmetry_cell_setting            Triclinic 
_symmetry_space_group_name_H-M    P-1 
_symmetry_space_group_name_Hall -P1
  
loop_ 
 _symmetry_equiv_pos_as_xyz 
 'x, y, z' 
 '-x, -y, -z' 
  
_cell_length_a                    7.0790(13) 
_cell_length_b                    10.7346(19) 
_cell_length_c                    11.415(2) 
_cell_angle_alpha                 89.405(4) 
_cell_angle_beta                  85.886(3) 
_cell_angle_gamma                 77.797(3) 
_cell_volume                      845.6(3) 
_cell_formula_units_Z             1 
_cell_measurement_temperature     100(2) 
_cell_measurement_reflns_used     823 
_cell_measurement_theta_min       2.63 
_cell_measurement_theta_max       26.32 
  
_exptl_crystal_description        block 
_exptl_crystal_colour             'pale orange' 
_exptl_crystal_size_max           0.30 
_exptl_crystal_size_mid           0.20 
_exptl_crystal_size_min           0.18 
_exptl_crystal_density_meas      ?
_exptl_crystal_density_diffrn     1.578 
_exptl_crystal_density_method     'not measured' 
_exptl_crystal_F_000              417 
_exptl_absorpt_coefficient_mu     0.597 
_exptl_absorpt_correction_type    multi-scan
_exptl_absorpt_correction_T_min   0.809 
_exptl_absorpt_correction_T_max   1.000
_exptl_absorpt_process_details    'SADABS'
  
_exptl_special_details 
; 
 ? 
; 
  
_diffrn_ambient_temperature       100(2) 
_diffrn_radiation_wavelength      0.71073 
_diffrn_radiation_type            MoK\a 
_diffrn_radiation_source          'fine-focus sealed tube' 
_diffrn_radiation_monochromator   graphite 
_diffrn_measurement_device_type   'CCD area detector' 
_diffrn_measurement_method        'phi and omega scans' 
_diffrn_detector_area_resol_mean  ? 
_diffrn_standards_number          ? 
_diffrn_standards_interval_count  ? 
_diffrn_standards_interval_time   ? 
_diffrn_standards_decay_%         ? 
_diffrn_reflns_number             6739 
_diffrn_reflns_av_R_equivalents   0.0203 
_diffrn_reflns_av_sigmaI/netI     0.0306 
_diffrn_reflns_limit_h_min        -8 
_diffrn_reflns_limit_h_max        8 
_diffrn_reflns_limit_k_min        -13 
_diffrn_reflns_limit_k_max        13 
_diffrn_reflns_limit_l_min        -14 
_diffrn_reflns_limit_l_max        14 
_diffrn_reflns_theta_min          1.79 
_diffrn_reflns_theta_max          26.36 
_reflns_number_total              3397 
_reflns_number_gt                 3098 
_reflns_threshold_expression      >2sigma(I) 
  
_computing_data_collection        'Bruker SMART' 
_computing_cell_refinement        'Bruker SMART' 
_computing_data_reduction         'Bruker SAINT' 
_computing_structure_solution     'SHELXS-97 (Sheldrick, 1990)' 
_computing_structure_refinement   'SHELXL-97 (Sheldrick, 1997)' 
_computing_molecular_graphics     'Bruker SHELXTL' 
_computing_publication_material   'Bruker SHELXTL' 
 
_refine_special_details 
; 
 Refinement of F^2^ against ALL reflections.  The weighted R-factor wR and 
 goodness of fit S are based on F^2^, conventional R-factors R are based 
 on F, with F set to zero for negative F^2^. The threshold expression of 
 F^2^ > 2sigma(F^2^) is used only for calculating R-factors(gt) etc. and is 
 not relevant to the choice of reflections for refinement.  R-factors based 
 on F^2^ are statistically about twice as large as those based on F, and R- 
 factors based on ALL data will be even larger. 
; 
 
_refine_ls_structure_factor_coef  Fsqd  
_refine_ls_matrix_type            full 
_refine_ls_weighting_scheme       calc  
_refine_ls_weighting_details 
 'calc w=1/[\s^2^(Fo^2^)+(0.0393P)^2^+0.3608P] where P=(Fo^2^+2Fc^2^)/3' 
_atom_sites_solution_primary      direct 
_atom_sites_solution_secondary    difmap 
_atom_sites_solution_hydrogens    geom 
_refine_ls_hydrogen_treatment     mixed 
_refine_ls_extinction_method      none 
_refine_ls_extinction_coef        ? 
_refine_ls_number_reflns          3397 
_refine_ls_number_parameters      313 
_refine_ls_number_restraints      0 
_refine_ls_R_factor_all           0.0354 
_refine_ls_R_factor_gt            0.0311 
_refine_ls_wR_factor_ref          0.0792 
_refine_ls_wR_factor_gt           0.0765 
_refine_ls_goodness_of_fit_ref    1.064 
_refine_ls_restrained_S_all       1.064 
_refine_ls_shift/su_max           0.000 
_refine_ls_shift/su_mean          0.000 
 
loop_ 
 _atom_site_label 
 _atom_site_type_symbol 
 _atom_site_fract_x 
 _atom_site_fract_y 
 _atom_site_fract_z 
 _atom_site_U_iso_or_equiv 
 _atom_site_adp_type 
 _atom_site_occupancy 
 _atom_site_symmetry_multiplicity 
 _atom_site_calc_flag 
 _atom_site_refinement_flags 
 _atom_site_disorder_assembly 
 _atom_site_disorder_group 
Co1 Co 1.0000 0.5000 1.0000 0.01155(10) Uani 1 2 d S . . 
O1 O 0.72478(16) 0.60827(11) 1.02760(10) 0.0153(2) Uani 1 1 d . . . 
O2 O 0.42482(16) 0.69126(11) 0.98514(10) 0.0176(3) Uani 1 1 d . . . 
O3 O 0.75394(17) 0.42738(11) 0.69631(10) 0.0168(3) Uani 1 1 d . . . 
O4 O 0.91507(16) 0.42532(11) 0.85541(10) 0.0146(2) Uani 1 1 d . . . 
O5 O 1.0972(2) 0.64631(13) 0.90139(12) 0.0218(3) Uani 1 1 d . . . 
C1 C 0.5939(2) 0.63424(15) 0.95533(14) 0.0128(3) Uani 1 1 d . . . 
C2 C 0.6455(2) 0.60188(16) 0.82623(15) 0.0142(3) Uani 1 1 d . . . 
C3 C 0.7797(2) 0.47521(15) 0.79002(14) 0.0129(3) Uani 1 1 d . . . 
N1 N 0.5808(2) 0.17388(15) 0.79161(14) 0.0187(3) Uani 1 1 d . . . 
N2 N 0.3687(2) 0.35390(14) 0.73455(13) 0.0154(3) Uani 1 1 d . . . 
C4 C 0.4942(2) 0.24370(16) 0.70594(15) 0.0158(3) Uani 1 1 d . . . 
C5 C 0.5252(3) 0.20853(19) 0.58623(16) 0.0220(4) Uani 1 1 d . . . 
C6 C 0.4363(3) 0.2889(2) 0.50461(17) 0.0272(4) Uani 1 1 d . . . 
C7 C 0.3134(3) 0.4061(2) 0.53727(17) 0.0258(4) Uani 1 1 d . . . 
C8 C 0.2804(3) 0.43523(17) 0.65285(16) 0.0192(4) Uani 1 1 d . . . 
N3 N 0.0157(2) 0.19534(15) 0.62959(14) 0.0189(3) Uani 1 1 d . . . 
N4 N 0.0703(2) 0.17150(14) 0.82633(12) 0.0153(3) Uani 1 1 d . . . 
C9 C 0.0980(2) 0.12482(16) 0.71537(15) 0.0155(3) Uani 1 1 d . . . 
C10 C 0.2169(3) 0.00145(17) 0.69785(16) 0.0187(4) Uani 1 1 d . . . 
C11 C 0.2940(3) -0.06496(17) 0.79135(17) 0.0219(4) Uani 1 1 d . . . 
C12 C 0.2592(3) -0.01326(17) 0.90537(17) 0.0212(4) Uani 1 1 d . . . 
C13 C 0.1481(3) 0.10541(17) 0.92018(16) 0.0182(4) Uani 1 1 d . . . 
N5 N 0.8755(2) 0.85958(13) 0.69136(12) 0.0169(3) Uani 1 1 d . . . 
O6 O 0.8414(2) 0.92422(12) 0.60061(11) 0.0253(3) Uani 1 1 d . . . 
O7 O 0.98774(18) 0.75177(11) 0.68434(11) 0.0220(3) Uani 1 1 d . . . 
O8 O 0.79909(19) 0.90197(13) 0.78878(11) 0.0259(3) Uani 1 1 d . . . 
H2 H 0.532(3) 0.6074(19) 0.7859(18) 0.021(5) Uiso 1 1 d . . . 
H5 H 0.612(3) 0.129(2) 0.5685(19) 0.027(6) Uiso 1 1 d . . . 
H8 H 0.201(3) 0.508(2) 0.6830(17) 0.019(5) Uiso 1 1 d . . . 
H2N1 H 0.651(3) 0.101(2) 0.7800(18) 0.024(6) Uiso 1 1 d . . . 
H2B H 0.707(3) 0.6658(19) 0.7960(17) 0.017(5) Uiso 1 1 d . . . 
H2N3 H -0.059(3) 0.267(2) 0.6439(18) 0.022(5) Uiso 1 1 d . . . 
H1N4 H 0.010(3) 0.248(2) 0.8349(18) 0.022(5) Uiso 1 1 d . . . 
H10 H 0.234(3) -0.029(2) 0.623(2) 0.029(6) Uiso 1 1 d . . . 
H13 H 0.116(3) 0.1495(19) 0.9928(18) 0.021(5) Uiso 1 1 d . . . 
H1N3 H 0.042(3) 0.168(2) 0.558(2) 0.029(6) Uiso 1 1 d . . . 
H2O5 H 1.059(3) 0.684(2) 0.844(2) 0.034(7) Uiso 1 1 d . . . 
H12 H 0.309(3) -0.056(2) 0.9709(19) 0.023(5) Uiso 1 1 d . . . 
H7 H 0.256(3) 0.460(2) 0.4828(19) 0.027(6) Uiso 1 1 d . . . 
H6 H 0.460(3) 0.265(2) 0.424(2) 0.032(6) Uiso 1 1 d . . . 
H1O5 H 1.203(4) 0.663(2) 0.920(2) 0.046(7) Uiso 1 1 d . . . 
H1N1 H 0.577(3) 0.206(2) 0.858(2) 0.033(6) Uiso 1 1 d . . . 
H11 H 0.371(3) -0.146(2) 0.7804(18) 0.024(5) Uiso 1 1 d . . . 
H1N2 H 0.343(3) 0.372(2) 0.806(2) 0.029(6) Uiso 1 1 d . . . 
 
loop_ 
 _atom_site_aniso_label 
 _atom_site_aniso_U_11 
 _atom_site_aniso_U_22 
 _atom_site_aniso_U_33 
 _atom_site_aniso_U_23 
 _atom_site_aniso_U_13 
 _atom_site_aniso_U_12 
Co1 0.01086(16) 0.01189(16) 0.01135(17) -0.00042(11) -0.00343(12) -0.00026(11) 
O1 0.0133(6) 0.0174(6) 0.0138(6) -0.0013(5) -0.0038(5) 0.0011(5) 
O2 0.0124(6) 0.0198(6) 0.0190(6) -0.0037(5) -0.0036(5) 0.0008(5) 
O3 0.0194(6) 0.0178(6) 0.0133(6) -0.0012(5) -0.0054(5) -0.0022(5) 
O4 0.0148(6) 0.0133(6) 0.0148(6) -0.0005(4) -0.0055(5) 0.0010(4) 
O5 0.0207(7) 0.0252(7) 0.0231(7) 0.0107(6) -0.0117(6) -0.0102(5) 
C1 0.0150(8) 0.0092(7) 0.0146(8) 0.0003(6) -0.0021(6) -0.0029(6) 
C2 0.0147(8) 0.0134(8) 0.0142(8) 0.0025(6) -0.0058(7) -0.0010(6) 
C3 0.0130(8) 0.0125(8) 0.0140(8) 0.0026(6) 0.0006(6) -0.0050(6) 
N1 0.0208(8) 0.0171(8) 0.0162(8) -0.0016(6) -0.0023(6) 0.0008(6) 
N2 0.0164(7) 0.0169(7) 0.0135(7) 0.0001(6) -0.0008(6) -0.0046(6) 
C4 0.0143(8) 0.0173(8) 0.0166(8) 0.0006(6) 0.0006(6) -0.0059(6) 
C5 0.0217(9) 0.0252(10) 0.0178(9) -0.0021(7) 0.0011(7) -0.0029(8) 
C6 0.0293(10) 0.0371(12) 0.0151(9) -0.0003(8) 0.0008(8) -0.0071(9) 
C7 0.0268(10) 0.0302(10) 0.0208(10) 0.0097(8) -0.0058(8) -0.0060(8) 
C8 0.0180(9) 0.0176(9) 0.0217(9) 0.0039(7) -0.0014(7) -0.0035(7) 
N3 0.0213(8) 0.0170(8) 0.0168(8) -0.0017(6) -0.0023(6) -0.0001(6) 
N4 0.0158(7) 0.0111(7) 0.0178(7) -0.0007(6) -0.0005(6) -0.0005(6) 
C9 0.0136(8) 0.0158(8) 0.0181(8) -0.0005(6) 0.0005(7) -0.0056(6) 
C10 0.0192(9) 0.0166(9) 0.0195(9) -0.0038(7) 0.0009(7) -0.0030(7) 
C11 0.0219(9) 0.0142(9) 0.0277(10) 0.0005(7) -0.0001(8) -0.0002(7) 
C12 0.0235(9) 0.0183(9) 0.0211(9) 0.0049(7) -0.0027(8) -0.0023(7) 
C13 0.0210(9) 0.0188(9) 0.0149(8) 0.0009(7) -0.0002(7) -0.0047(7) 
N5 0.0194(7) 0.0161(7) 0.0160(7) 0.0011(6) -0.0043(6) -0.0044(6) 
O6 0.0368(8) 0.0215(7) 0.0168(6) 0.0062(5) -0.0086(6) -0.0024(6) 
O7 0.0271(7) 0.0142(6) 0.0227(7) 0.0006(5) -0.0037(5) 0.0010(5) 
O8 0.0296(7) 0.0267(7) 0.0173(7) -0.0006(5) 0.0042(6) 0.0014(6) 
 
_geom_special_details 
; 
 All esds (except the esd in the dihedral angle between two l.s. planes) 
 are estimated using the full covariance matrix.  The cell esds are taken 
 into account individually in the estimation of esds in distances, angles 
 and torsion angles; correlations between esds in cell parameters are only 
 used when they are defined by crystal symmetry.  An approximate (isotropic) 
 treatment of cell esds is used for estimating esds involving l.s. planes. 
; 
 
loop_ 
 _geom_bond_atom_site_label_1 
 _geom_bond_atom_site_label_2 
 _geom_bond_distance 
 _geom_bond_site_symmetry_2 
 _geom_bond_publ_flag 
Co1 O4 2.0252(11) 2_767 ? 
Co1 O4 2.0253(11) . ? 
Co1 O1 2.0514(11) . ? 
Co1 O1 2.0514(11) 2_767 ? 
Co1 O5 2.1253(13) . ? 
Co1 O5 2.1253(13) 2_767 ? 
O1 C1 1.270(2) . ? 
O2 C1 1.249(2) . ? 
O3 C3 1.233(2) . ? 
O4 C3 1.2803(19) . ? 
O5 H2O5 0.80(3) . ? 
O5 H1O5 0.85(3) . ? 
C1 C2 1.518(2) . ? 
C2 C3 1.527(2) . ? 
C2 H2 0.95(2) . ? 
C2 H2B 0.94(2) . ? 
N1 C4 1.330(2) . ? 
N1 H2N1 0.84(2) . ? 
N1 H1N1 0.83(2) . ? 
N2 C4 1.348(2) . ? 
N2 C8 1.363(2) . ? 
N2 H1N2 0.84(2) . ? 
C4 C5 1.411(2) . ? 
C5 C6 1.359(3) . ? 
C5 H5 0.95(2) . ? 
C6 C7 1.407(3) . ? 
C6 H6 0.96(2) . ? 
C7 C8 1.351(3) . ? 
C7 H7 0.90(2) . ? 
C8 H8 0.92(2) . ? 
N3 C9 1.323(2) . ? 
N3 H2N3 0.84(2) . ? 
N3 H1N3 0.86(2) . ? 
N4 C9 1.353(2) . ? 
N4 C13 1.363(2) . ? 
N4 H1N4 0.85(2) . ? 
C9 C10 1.418(2) . ? 
C10 C11 1.360(3) . ? 
C10 H10 0.91(2) . ? 
C11 C12 1.405(3) . ? 
C11 H11 0.93(2) . ? 
C12 C13 1.353(3) . ? 
C12 H12 0.92(2) . ? 
C13 H13 0.95(2) . ? 
N5 O8 1.2477(19) . ? 
N5 O6 1.2501(19) . ? 
N5 O7 1.2574(18) . ? 
 
loop_ 
 _geom_angle_atom_site_label_1 
 _geom_angle_atom_site_label_2 
 _geom_angle_atom_site_label_3 
 _geom_angle 
 _geom_angle_site_symmetry_1 
 _geom_angle_site_symmetry_3 
 _geom_angle_publ_flag 
O4 Co1 O4 180.00(3) 2_767 . ? 
O4 Co1 O1 91.33(5) 2_767 . ? 
O4 Co1 O1 88.67(5) . . ? 
O4 Co1 O1 88.67(5) 2_767 2_767 ? 
O4 Co1 O1 91.33(5) . 2_767 ? 
O1 Co1 O1 180.0 . 2_767 ? 
O4 Co1 O5 87.58(5) 2_767 . ? 
O4 Co1 O5 92.42(5) . . ? 
O1 Co1 O5 92.41(5) . . ? 
O1 Co1 O5 87.59(5) 2_767 . ? 
O4 Co1 O5 92.42(5) 2_767 2_767 ? 
O4 Co1 O5 87.58(5) . 2_767 ? 
O1 Co1 O5 87.59(5) . 2_767 ? 
O1 Co1 O5 92.41(5) 2_767 2_767 ? 
O5 Co1 O5 179.999(1) . 2_767 ? 
C1 O1 Co1 128.24(10) . . ? 
C3 O4 Co1 128.54(10) . . ? 
Co1 O5 H2O5 132.0(17) . . ? 
Co1 O5 H1O5 115.5(18) . . ? 
H2O5 O5 H1O5 112(2) . . ? 
O2 C1 O1 122.53(15) . . ? 
O2 C1 C2 118.04(14) . . ? 
O1 C1 C2 119.35(14) . . ? 
C1 C2 C3 120.16(14) . . ? 
C1 C2 H2 110.4(12) . . ? 
C3 C2 H2 106.6(12) . . ? 
C1 C2 H2B 105.8(12) . . ? 
C3 C2 H2B 106.1(12) . . ? 
H2 C2 H2B 107.1(17) . . ? 
O3 C3 O4 123.14(15) . . ? 
O3 C3 C2 117.39(14) . . ? 
O4 C3 C2 119.45(14) . . ? 
C4 N1 H2N1 122.8(14) . . ? 
C4 N1 H1N1 119.5(16) . . ? 
H2N1 N1 H1N1 117(2) . . ? 
C4 N2 C8 122.94(16) . . ? 
C4 N2 H1N2 117.8(15) . . ? 
C8 N2 H1N2 119.2(15) . . ? 
N1 C4 N2 118.52(16) . . ? 
N1 C4 C5 123.66(16) . . ? 
N2 C4 C5 117.82(16) . . ? 
C6 C5 C4 119.28(17) . . ? 
C6 C5 H5 124.5(13) . . ? 
C4 C5 H5 116.2(13) . . ? 
C5 C6 C7 121.27(18) . . ? 
C5 C6 H6 118.9(14) . . ? 
C7 C6 H6 119.8(14) . . ? 
C8 C7 C6 118.19(18) . . ? 
C8 C7 H7 120.8(14) . . ? 
C6 C7 H7 121.0(14) . . ? 
C7 C8 N2 120.35(17) . . ? 
C7 C8 H8 124.9(13) . . ? 
N2 C8 H8 114.8(13) . . ? 
C9 N3 H2N3 120.8(14) . . ? 
C9 N3 H1N3 118.5(15) . . ? 
H2N3 N3 H1N3 121(2) . . ? 
C9 N4 C13 123.29(15) . . ? 
C9 N4 H1N4 116.5(14) . . ? 
C13 N4 H1N4 119.9(14) . . ? 
N3 C9 N4 119.22(16) . . ? 
N3 C9 C10 123.58(16) . . ? 
N4 C9 C10 117.20(15) . . ? 
C11 C10 C9 119.64(17) . . ? 
C11 C10 H10 123.9(14) . . ? 
C9 C10 H10 116.5(14) . . ? 
C10 C11 C12 121.16(17) . . ? 
C10 C11 H11 119.9(13) . . ? 
C12 C11 H11 118.9(13) . . ? 
C13 C12 C11 118.40(17) . . ? 
C13 C12 H12 118.2(13) . . ? 
C11 C12 H12 123.4(13) . . ? 
C12 C13 N4 120.29(17) . . ? 
C12 C13 H13 125.4(12) . . ? 
N4 C13 H13 114.3(12) . . ? 
O8 N5 O6 120.17(14) . . ? 
O8 N5 O7 119.99(14) . . ? 
O6 N5 O7 119.84(14) . . ? 
 
loop_ 
 _geom_torsion_atom_site_label_1 
 _geom_torsion_atom_site_label_2 
 _geom_torsion_atom_site_label_3 
 _geom_torsion_atom_site_label_4 
 _geom_torsion 
 _geom_torsion_site_symmetry_1 
 _geom_torsion_site_symmetry_2 
 _geom_torsion_site_symmetry_3 
 _geom_torsion_site_symmetry_4 
 _geom_torsion_publ_flag 
O4 Co1 O1 C1 162.60(13) 2_767 . . . ? 
O4 Co1 O1 C1 -17.40(13) . . . . ? 
O1 Co1 O1 C1 -103(28) 2_767 . . . ? 
O5 Co1 O1 C1 74.97(14) . . . . ? 
O5 Co1 O1 C1 -105.04(14) 2_767 . . . ? 
O4 Co1 O4 C3 117(64) 2_767 . . . ? 
O1 Co1 O4 C3 26.67(13) . . . . ? 
O1 Co1 O4 C3 -153.33(13) 2_767 . . . ? 
O5 Co1 O4 C3 -65.69(14) . . . . ? 
O5 Co1 O4 C3 114.31(14) 2_767 . . . ? 
Co1 O1 C1 O2 172.94(11) . . . . ? 
Co1 O1 C1 C2 -10.6(2) . . . . ? 
O2 C1 C2 C3 -141.68(15) . . . . ? 
O1 C1 C2 C3 41.7(2) . . . . ? 
Co1 O4 C3 O3 171.60(11) . . . . ? 
Co1 O4 C3 C2 -6.6(2) . . . . ? 
C1 C2 C3 O3 149.00(15) . . . . ? 
C1 C2 C3 O4 -32.7(2) . . . . ? 
C8 N2 C4 N1 176.50(16) . . . . ? 
C8 N2 C4 C5 -4.0(2) . . . . ? 
N1 C4 C5 C6 -177.22(18) . . . . ? 
N2 C4 C5 C6 3.3(3) . . . . ? 
C4 C5 C6 C7 -0.3(3) . . . . ? 
C5 C6 C7 C8 -2.2(3) . . . . ? 
C6 C7 C8 N2 1.7(3) . . . . ? 
C4 N2 C8 C7 1.5(3) . . . . ? 
C13 N4 C9 N3 179.53(16) . . . . ? 
C13 N4 C9 C10 -0.9(2) . . . . ? 
N3 C9 C10 C11 -179.29(17) . . . . ? 
N4 C9 C10 C11 1.2(3) . . . . ? 
C9 C10 C11 C12 -0.4(3) . . . . ? 
C10 C11 C12 C13 -0.7(3) . . . . ? 
C11 C12 C13 N4 1.0(3) . . . . ? 
C9 N4 C13 C12 -0.2(3) . . . . ? 
 
loop_ 
 _geom_hbond_atom_site_label_D 
 _geom_hbond_atom_site_label_H 
 _geom_hbond_atom_site_label_A 
 _geom_hbond_distance_DH 
 _geom_hbond_distance_HA 
 _geom_hbond_distance_DA 
 _geom_hbond_angle_DHA 
 _geom_hbond_site_symmetry_A 
O5 H1O5 O2  0.85(3) 1.87(3) 2.7065(18) 171(3) 1_655 
N4 H1N4 O4  0.85(2) 1.89(2) 2.7280(19) 171(2) 1_455 
N1 H1N1 O2  0.83(2) 2.11(3) 2.938(2) 172(2) 2_667 
N3 H2N3 O3  0.84(2) 2.01(2) 2.847(2) 173(2) 1_455 
N2 H1N2 O1  0.84(2) 1.92(2) 2.7614(19) 173(2) 2_667 
O5 H2O5 O7  0.80(3) 2.01(3) 2.8048(19) 170(2) . 
N3 H1N3 O6  0.86(2) 2.10(2) 2.952(2) 168(2) 2_666 
N1 H2N1 O8  0.84(2) 2.17(2) 2.999(2) 167(2) 1_545 
 
_diffrn_measured_fraction_theta_max    0.983 
_diffrn_reflns_theta_full              26.36 
_diffrn_measured_fraction_theta_full   0.983 
_refine_diff_density_max    0.339 
_refine_diff_density_min   -0.273 
_refine_diff_density_rms    0.057 
#END
 
data_m17m 
 
_audit_creation_method            SHELXL-97 
_chemical_name_systematic 
; 
 ? 
; 
_chemical_name_common             ? 
_chemical_melting_point           ? 
_chemical_formula_moiety          'C6 H8 Co O10, 4(C5 H7 N2), 2(Cl O4)' 
_chemical_formula_sum 
 'C26 H36 Cl2 Co N8 O18' 
_chemical_formula_weight          878.46 
  
loop_ 
 _atom_type_symbol 
 _atom_type_description 
 _atom_type_scat_dispersion_real 
 _atom_type_scat_dispersion_imag 
 _atom_type_scat_source 
 'C'  'C'   0.0033   0.0016 
 'International Tables Vol C Tables 4.2.6.8 and 6.1.1.4' 
 'H'  'H'   0.0000   0.0000 
 'International Tables Vol C Tables 4.2.6.8 and 6.1.1.4' 
 'N'  'N'   0.0061   0.0033 
 'International Tables Vol C Tables 4.2.6.8 and 6.1.1.4' 
 'O'  'O'   0.0106   0.0060 
 'International Tables Vol C Tables 4.2.6.8 and 6.1.1.4' 
 'Cl'  'Cl'   0.1484   0.1585 
 'International Tables Vol C Tables 4.2.6.8 and 6.1.1.4' 
 'Co'  'Co'   0.3494   0.9721 
 'International Tables Vol C Tables 4.2.6.8 and 6.1.1.4' 
  
_symmetry_cell_setting            Triclinic 
_symmetry_space_group_name_H-M    P-1 
_symmetry_space_group_name_Hall   -P1

loop_ 
 _symmetry_equiv_pos_as_xyz 
 'x, y, z' 
 '-x, -y, -z' 
  
_cell_length_a                    7.1122(7) 
_cell_length_b                    11.2696(10) 
_cell_length_c                    11.7951(11) 
_cell_angle_alpha                 86.908(2) 
_cell_angle_beta                  84.168(2) 
_cell_angle_gamma                 72.440(2) 
_cell_volume                      896.41(15) 
_cell_formula_units_Z             1 
_cell_measurement_temperature     100(2) 
_cell_measurement_reflns_used     2869 
_cell_measurement_theta_min       2.54 
_cell_measurement_theta_max       26.32 
  
_exptl_crystal_description        block 
_exptl_crystal_colour             pink 
_exptl_crystal_size_max           0.50 
_exptl_crystal_size_mid           0.40 
_exptl_crystal_size_min           0.40 
_exptl_crystal_density_meas       ? 
_exptl_crystal_density_diffrn     1.627 
_exptl_crystal_density_method     'not measured' 
_exptl_crystal_F_000              453 
_exptl_absorpt_coefficient_mu     0.717 
_exptl_absorpt_correction_type    none 
_exptl_absorpt_correction_T_min   ? 
_exptl_absorpt_correction_T_max   ? 
_exptl_absorpt_process_details    ? 
  
_exptl_special_details 
; 
 ? 
; 
  
_diffrn_ambient_temperature       100(2) 
_diffrn_radiation_wavelength      0.71073 
_diffrn_radiation_type            MoK\a 
_diffrn_radiation_source          'fine-focus sealed tube' 
_diffrn_radiation_monochromator   graphite 
_diffrn_measurement_device_type   'CCD area detector' 
_diffrn_measurement_method        'phi and omega scans' 
_diffrn_detector_area_resol_mean  ? 
_diffrn_standards_number          ? 
_diffrn_standards_interval_count  ? 
_diffrn_standards_interval_time   ? 
_diffrn_standards_decay_%         ? 
_diffrn_reflns_number             5183 
_diffrn_reflns_av_R_equivalents   0.0242 
_diffrn_reflns_av_sigmaI/netI     0.0385 
_diffrn_reflns_limit_h_min        -8 
_diffrn_reflns_limit_h_max        8 
_diffrn_reflns_limit_k_min        -10 
_diffrn_reflns_limit_k_max        14 
_diffrn_reflns_limit_l_min        -14 
_diffrn_reflns_limit_l_max        14 
_diffrn_reflns_theta_min          2.54 
_diffrn_reflns_theta_max          26.38 
_reflns_number_total              3548 
_reflns_number_gt                 3050 
_reflns_threshold_expression      >2sigma(I) 
  
_computing_data_collection        'Bruker SMART' 
_computing_cell_refinement        'Bruker SMART' 
_computing_data_reduction         'Bruker SAINT' 
_computing_structure_solution     'SHELXS-97 (Sheldrick, 1990)' 
_computing_structure_refinement   'SHELXL-97 (Sheldrick, 1997)' 
_computing_molecular_graphics     'Bruker SHELXTL' 
_computing_publication_material   'Bruker SHELXTL' 
 
_refine_special_details 
; 
 Refinement of F^2^ against ALL reflections.  The weighted R-factor wR and 
 goodness of fit S are based on F^2^, conventional R-factors R are based 
 on F, with F set to zero for negative F^2^. The threshold expression of 
 F^2^ > 2sigma(F^2^) is used only for calculating R-factors(gt) etc. and is 
 not relevant to the choice of reflections for refinement.  R-factors based 
 on F^2^ are statistically about twice as large as those based on F, and R- 
 factors based on ALL data will be even larger. 
; 
 
_refine_ls_structure_factor_coef  Fsqd  
_refine_ls_matrix_type            full 
_refine_ls_weighting_scheme       calc  
_refine_ls_weighting_details 
 'calc w=1/[\s^2^(Fo^2^)+(0.0469P)^2^+0.0000P] where P=(Fo^2^+2Fc^2^)/3' 
_atom_sites_solution_primary      direct 
_atom_sites_solution_secondary    difmap 
_atom_sites_solution_hydrogens    geom 
_refine_ls_hydrogen_treatment     mixed 
_refine_ls_extinction_method      none 
_refine_ls_extinction_coef        ? 
_refine_ls_number_reflns          3548 
_refine_ls_number_parameters      322 
_refine_ls_number_restraints      0 
_refine_ls_R_factor_all           0.0363 
_refine_ls_R_factor_gt            0.0309 
_refine_ls_wR_factor_ref          0.0808 
_refine_ls_wR_factor_gt           0.0787 
_refine_ls_goodness_of_fit_ref    0.994 
_refine_ls_restrained_S_all       0.994 
_refine_ls_shift/su_max           0.001 
_refine_ls_shift/su_mean          0.000 
 
loop_ 
 _atom_site_label 
 _atom_site_type_symbol 
 _atom_site_fract_x 
 _atom_site_fract_y 
 _atom_site_fract_z 
 _atom_site_U_iso_or_equiv 
 _atom_site_adp_type 
 _atom_site_occupancy 
 _atom_site_symmetry_multiplicity 
 _atom_site_calc_flag 
 _atom_site_refinement_flags 
 _atom_site_disorder_assembly 
 _atom_site_disorder_group 
Co1 Co 1.0000 0.5000 1.0000 0.01373(11) Uani 1 2 d S . . 
O1 O 0.71778(18) 0.61862(12) 1.02798(10) 0.0166(3) Uani 1 1 d . . . 
O2 O 0.40001(18) 0.68696(12) 1.00003(11) 0.0202(3) Uani 1 1 d . . . 
O3 O 0.75347(19) 0.45395(12) 0.70668(10) 0.0194(3) Uani 1 1 d . . . 
O4 O 0.91764(18) 0.43911(11) 0.85918(10) 0.0166(3) Uani 1 1 d . . . 
O5 O 1.1079(2) 0.63494(14) 0.90430(12) 0.0207(3) Uani 1 1 d . . . 
H1O5 H 1.204(4) 0.654(3) 0.938(2) 0.055(8) Uiso 1 1 d . . . 
H2O5 H 1.042(4) 0.694(2) 0.872(2) 0.040(8) Uiso 1 1 d . . . 
C1 C 0.5774(3) 0.64062(16) 0.96377(15) 0.0150(4) Uani 1 1 d . . . 
C2 C 0.6268(3) 0.61596(18) 0.83741(15) 0.0168(4) Uani 1 1 d . . . 
H2 H 0.518(3) 0.6217(19) 0.8077(17) 0.021(5) Uiso 1 1 d . . . 
H2B H 0.682(3) 0.678(2) 0.8089(18) 0.028(6) Uiso 1 1 d . . . 
C3 C 0.7753(3) 0.49347(17) 0.79845(14) 0.0148(4) Uani 1 1 d . . . 
N1 N 0.6174(3) 0.19862(17) 0.77829(15) 0.0215(4) Uani 1 1 d . . . 
H1N1 H 0.611(3) 0.2235(19) 0.8472(18) 0.019(5) Uiso 1 1 d . . . 
H2N1 H 0.711(4) 0.131(2) 0.754(2) 0.042(7) Uiso 1 1 d . . . 
N2 N 0.3735(2) 0.37888(15) 0.73650(14) 0.0171(3) Uani 1 1 d . . . 
H1N2 H 0.352(3) 0.387(2) 0.8096(19) 0.023(6) Uiso 1 1 d . . . 
C4 C 0.5176(3) 0.27667(17) 0.70051(16) 0.0175(4) Uani 1 1 d . . . 
C5 C 0.5523(3) 0.25714(19) 0.58184(16) 0.0199(4) Uani 1 1 d . . . 
H5 H 0.654(3) 0.186(2) 0.5564(18) 0.027(6) Uiso 1 1 d . . . 
C6 C 0.4446(3) 0.34298(19) 0.50954(17) 0.0222(4) Uani 1 1 d . . . 
H6 H 0.465(3) 0.336(2) 0.430(2) 0.035(6) Uiso 1 1 d . . . 
C7 C 0.2991(3) 0.45048(19) 0.55032(17) 0.0215(4) Uani 1 1 d . . . 
H7 H 0.227(3) 0.5093(18) 0.5026(17) 0.020(5) Uiso 1 1 d . . . 
C8 C 0.2673(3) 0.46567(19) 0.66422(16) 0.0196(4) Uani 1 1 d . . . 
H8 H 0.179(3) 0.533(2) 0.6994(16) 0.022(5) Uiso 1 1 d . . . 
N3 N 0.0532(3) 0.23723(17) 0.63499(15) 0.0214(4) Uani 1 1 d . . . 
H1N3 H 0.082(3) 0.226(2) 0.564(2) 0.030(6) Uiso 1 1 d . . . 
H2N3 H -0.040(4) 0.307(2) 0.655(2) 0.039(7) Uiso 1 1 d . . . 
N4 N 0.1042(2) 0.18858(16) 0.82376(13) 0.0201(4) Uani 1 1 d . . . 
H1N4 H 0.033(3) 0.263(2) 0.8357(19) 0.033(7) Uiso 1 1 d . . . 
C9 C 0.1435(3) 0.15663(18) 0.71307(16) 0.0189(4) Uani 1 1 d . . . 
C10 C 0.2790(3) 0.03872(19) 0.68763(19) 0.0248(4) Uani 1 1 d . . . 
H10 H 0.301(3) 0.021(2) 0.6118(18) 0.023(5) Uiso 1 1 d . . . 
C11 C 0.3578(3) -0.0393(2) 0.7734(2) 0.0305(5) Uani 1 1 d . . . 
H11 H 0.445(4) -0.121(2) 0.756(2) 0.043(7) Uiso 1 1 d . . . 
C12 C 0.3088(3) -0.0043(2) 0.8880(2) 0.0326(5) Uani 1 1 d . . . 
H12 H 0.357(4) -0.054(2) 0.952(2) 0.044(7) Uiso 1 1 d . . . 
C13 C 0.1838(3) 0.1107(2) 0.90997(19) 0.0274(5) Uani 1 1 d . . . 
H13 H 0.149(3) 0.140(2) 0.983(2) 0.039(7) Uiso 1 1 d . . . 
Cl1 Cl 0.91795(7) 0.85756(4) 0.67418(4) 0.01905(12) Uani 1 1 d . . . 
O6 O 0.8619(2) 0.84762(13) 0.79508(11) 0.0262(3) Uani 1 1 d . . . 
O7 O 0.8869(2) 0.98589(13) 0.64239(13) 0.0307(4) Uani 1 1 d . . . 
O8 O 0.7956(2) 0.80757(16) 0.61280(12) 0.0393(4) Uani 1 1 d . . . 
O9 O 1.1219(2) 0.78834(13) 0.64963(13) 0.0321(4) Uani 1 1 d . . . 
 
loop_ 
 _atom_site_aniso_label 
 _atom_site_aniso_U_11 
 _atom_site_aniso_U_22 
 _atom_site_aniso_U_33 
 _atom_site_aniso_U_23 
 _atom_site_aniso_U_13 
 _atom_site_aniso_U_12 
Co1 0.01061(19) 0.01602(19) 0.01414(18) -0.00057(13) -0.00330(13) -0.00263(14) 
O1 0.0125(6) 0.0201(7) 0.0157(6) -0.0023(5) -0.0035(5) -0.0014(5) 
O2 0.0114(7) 0.0258(8) 0.0220(7) -0.0050(6) -0.0022(5) -0.0025(6) 
O3 0.0201(7) 0.0222(7) 0.0162(7) -0.0026(5) -0.0052(5) -0.0052(6) 
O4 0.0148(7) 0.0172(7) 0.0171(6) -0.0004(5) -0.0045(5) -0.0027(5) 
O5 0.0169(7) 0.0231(8) 0.0237(7) 0.0062(6) -0.0085(6) -0.0075(6) 
C1 0.0139(9) 0.0111(9) 0.0209(9) 0.0012(7) -0.0044(7) -0.0047(7) 
C2 0.0132(9) 0.0198(10) 0.0171(9) 0.0020(7) -0.0052(7) -0.0040(8) 
C3 0.0126(9) 0.0167(9) 0.0164(9) 0.0016(7) -0.0009(7) -0.0068(7) 
N1 0.0218(9) 0.0214(9) 0.0198(9) -0.0019(7) -0.0037(7) -0.0035(7) 
N2 0.0177(8) 0.0200(8) 0.0148(8) -0.0014(6) -0.0006(6) -0.0076(7) 
C4 0.0163(9) 0.0180(10) 0.0212(9) -0.0010(7) -0.0013(7) -0.0094(8) 
C5 0.0187(10) 0.0221(11) 0.0205(10) -0.0032(8) 0.0003(8) -0.0088(8) 
C6 0.0247(11) 0.0299(11) 0.0163(10) -0.0011(8) 0.0000(8) -0.0153(9) 
C7 0.0219(10) 0.0217(11) 0.0226(10) 0.0046(8) -0.0056(8) -0.0090(9) 
C8 0.0175(10) 0.0180(10) 0.0239(10) 0.0010(8) -0.0024(8) -0.0064(8) 
N3 0.0223(9) 0.0216(9) 0.0193(9) -0.0033(7) -0.0013(7) -0.0047(8) 
N4 0.0193(9) 0.0159(9) 0.0237(9) -0.0009(7) -0.0023(7) -0.0032(7) 
C9 0.0156(9) 0.0188(10) 0.0258(10) -0.0022(8) -0.0024(8) -0.0099(8) 
C10 0.0198(11) 0.0223(11) 0.0332(12) -0.0092(9) -0.0012(9) -0.0063(9) 
C11 0.0234(11) 0.0182(11) 0.0496(14) -0.0047(10) -0.0076(10) -0.0036(9) 
C12 0.0329(13) 0.0220(12) 0.0430(14) 0.0076(10) -0.0142(11) -0.0061(10) 
C13 0.0311(12) 0.0242(11) 0.0266(11) 0.0029(9) -0.0055(9) -0.0075(9) 
Cl1 0.0209(3) 0.0175(2) 0.0188(2) -0.00150(17) -0.00097(18) -0.00591(19) 
O6 0.0262(8) 0.0298(8) 0.0193(7) 0.0006(6) -0.0015(6) -0.0038(6) 
O7 0.0300(8) 0.0190(8) 0.0394(9) 0.0075(6) 0.0001(7) -0.0041(6) 
O8 0.0450(10) 0.0580(11) 0.0277(8) -0.0136(8) 0.0004(7) -0.0337(9) 
O9 0.0246(8) 0.0231(8) 0.0408(9) -0.0023(7) 0.0084(7) 0.0013(6) 
 
_geom_special_details 
; 
 All esds (except the esd in the dihedral angle between two l.s. planes) 
 are estimated using the full covariance matrix.  The cell esds are taken 
 into account individually in the estimation of esds in distances, angles 
 and torsion angles; correlations between esds in cell parameters are only 
 used when they are defined by crystal symmetry.  An approximate (isotropic) 
 treatment of cell esds is used for estimating esds involving l.s. planes. 
; 
 
loop_ 
 _geom_bond_atom_site_label_1 
 _geom_bond_atom_site_label_2 
 _geom_bond_distance 
 _geom_bond_site_symmetry_2 
 _geom_bond_publ_flag 
Co1 O4 2.0337(12) . ? 
Co1 O4 2.0337(12) 2_767 ? 
Co1 O1 2.0539(12) . ? 
Co1 O1 2.0540(12) 2_767 ? 
Co1 O5 2.1257(14) . ? 
Co1 O5 2.1257(14) 2_767 ? 
O1 C1 1.271(2) . ? 
O2 C1 1.251(2) . ? 
O3 C3 1.234(2) . ? 
O4 C3 1.280(2) . ? 
O5 H1O5 0.90(3) . ? 
O5 H2O5 0.79(3) . ? 
C1 C2 1.517(2) . ? 
C2 C3 1.524(3) . ? 
C2 H2 0.86(2) . ? 
C2 H2B 0.93(2) . ? 
N1 C4 1.337(2) . ? 
N1 H1N1 0.87(2) . ? 
N1 H2N1 0.88(3) . ? 
N2 C4 1.345(2) . ? 
N2 C8 1.360(2) . ? 
N2 H1N2 0.87(2) . ? 
C4 C5 1.414(3) . ? 
C5 C6 1.359(3) . ? 
C5 H5 0.94(2) . ? 
C6 C7 1.406(3) . ? 
C6 H6 0.94(2) . ? 
C7 C8 1.351(3) . ? 
C7 H7 0.91(2) . ? 
C8 H8 0.92(2) . ? 
N3 C9 1.328(3) . ? 
N3 H1N3 0.85(2) . ? 
N3 H2N3 0.89(3) . ? 
N4 C9 1.352(2) . ? 
N4 C13 1.358(3) . ? 
N4 H1N4 0.85(2) . ? 
C9 C10 1.413(3) . ? 
C10 C11 1.353(3) . ? 
C10 H10 0.91(2) . ? 
C11 C12 1.409(3) . ? 
C11 H11 0.96(2) . ? 
C12 C13 1.353(3) . ? 
C12 H12 0.95(3) . ? 
C13 H13 0.92(2) . ? 
Cl1 O7 1.4306(14) . ? 
Cl1 O9 1.4330(15) . ? 
Cl1 O8 1.4377(15) . ? 
Cl1 O6 1.4489(14) . ? 
 
loop_ 
 _geom_angle_atom_site_label_1 
 _geom_angle_atom_site_label_2 
 _geom_angle_atom_site_label_3 
 _geom_angle 
 _geom_angle_site_symmetry_1 
 _geom_angle_site_symmetry_3 
 _geom_angle_publ_flag 
O4 Co1 O4 180.000(2) . 2_767 ? 
O4 Co1 O1 88.95(5) . . ? 
O4 Co1 O1 91.05(5) 2_767 . ? 
O4 Co1 O1 91.05(5) . 2_767 ? 
O4 Co1 O1 88.95(5) 2_767 2_767 ? 
O1 Co1 O1 180.00(7) . 2_767 ? 
O4 Co1 O5 92.69(5) . . ? 
O4 Co1 O5 87.31(5) 2_767 . ? 
O1 Co1 O5 93.80(5) . . ? 
O1 Co1 O5 86.20(5) 2_767 . ? 
O4 Co1 O5 87.32(5) . 2_767 ? 
O4 Co1 O5 92.68(5) 2_767 2_767 ? 
O1 Co1 O5 86.20(5) . 2_767 ? 
O1 Co1 O5 93.80(5) 2_767 2_767 ? 
O5 Co1 O5 179.999(1) . 2_767 ? 
C1 O1 Co1 127.88(11) . . ? 
C3 O4 Co1 129.29(11) . . ? 
Co1 O5 H1O5 112.7(17) . . ? 
Co1 O5 H2O5 125.6(19) . . ? 
H1O5 O5 H2O5 110(3) . . ? 
O2 C1 O1 122.38(16) . . ? 
O2 C1 C2 118.55(16) . . ? 
O1 C1 C2 119.00(16) . . ? 
C1 C2 C3 119.72(15) . . ? 
C1 C2 H2 108.2(13) . . ? 
C3 C2 H2 106.7(14) . . ? 
C1 C2 H2B 104.9(13) . . ? 
C3 C2 H2B 105.7(13) . . ? 
H2 C2 H2B 111.6(19) . . ? 
O3 C3 O4 123.48(17) . . ? 
O3 C3 C2 117.00(16) . . ? 
O4 C3 C2 119.48(15) . . ? 
C4 N1 H1N1 119.4(14) . . ? 
C4 N1 H2N1 118.3(16) . . ? 
H1N1 N1 H2N1 120(2) . . ? 
C4 N2 C8 123.13(16) . . ? 
C4 N2 H1N2 115.7(14) . . ? 
C8 N2 H1N2 121.2(14) . . ? 
N1 C4 N2 118.60(17) . . ? 
N1 C4 C5 123.75(18) . . ? 
N2 C4 C5 117.64(17) . . ? 
C6 C5 C4 119.27(19) . . ? 
C6 C5 H5 122.9(13) . . ? 
C4 C5 H5 117.8(13) . . ? 
C5 C6 C7 121.37(18) . . ? 
C5 C6 H6 122.8(14) . . ? 
C7 C6 H6 115.8(14) . . ? 
C8 C7 C6 118.00(19) . . ? 
C8 C7 H7 119.8(12) . . ? 
C6 C7 H7 122.2(12) . . ? 
C7 C8 N2 120.54(19) . . ? 
C7 C8 H8 124.9(13) . . ? 
N2 C8 H8 114.5(13) . . ? 
C9 N3 H1N3 122.6(16) . . ? 
C9 N3 H2N3 120.8(15) . . ? 
H1N3 N3 H2N3 117(2) . . ? 
C9 N4 C13 122.74(18) . . ? 
C9 N4 H1N4 115.4(15) . . ? 
C13 N4 H1N4 121.7(15) . . ? 
N3 C9 N4 118.45(18) . . ? 
N3 C9 C10 123.93(18) . . ? 
N4 C9 C10 117.62(18) . . ? 
C11 C10 C9 119.7(2) . . ? 
C11 C10 H10 125.6(14) . . ? 
C9 C10 H10 114.6(14) . . ? 
C10 C11 C12 121.1(2) . . ? 
C10 C11 H11 119.7(15) . . ? 
C12 C11 H11 119.2(14) . . ? 
C13 C12 C11 118.1(2) . . ? 
C13 C12 H12 116.4(15) . . ? 
C11 C12 H12 125.5(15) . . ? 
C12 C13 N4 120.7(2) . . ? 
C12 C13 H13 122.3(16) . . ? 
N4 C13 H13 117.0(16) . . ? 
O7 Cl1 O9 110.29(9) . . ? 
O7 Cl1 O8 109.56(10) . . ? 
O9 Cl1 O8 109.78(10) . . ? 
O7 Cl1 O6 109.11(9) . . ? 
O9 Cl1 O6 109.58(9) . . ? 
O8 Cl1 O6 108.49(9) . . ? 
 
loop_ 
 _geom_torsion_atom_site_label_1 
 _geom_torsion_atom_site_label_2 
 _geom_torsion_atom_site_label_3 
 _geom_torsion_atom_site_label_4 
 _geom_torsion 
 _geom_torsion_site_symmetry_1 
 _geom_torsion_site_symmetry_2 
 _geom_torsion_site_symmetry_3 
 _geom_torsion_site_symmetry_4 
 _geom_torsion_publ_flag 
O4 Co1 O1 C1 -6.77(14) . . . . ? 
O4 Co1 O1 C1 173.23(14) 2_767 . . . ? 
O1 Co1 O1 C1 -128(46) 2_767 . . . ? 
O5 Co1 O1 C1 85.85(15) . . . . ? 
O5 Co1 O1 C1 -94.15(15) 2_767 . . . ? 
O4 Co1 O4 C3 -157(92) 2_767 . . . ? 
O1 Co1 O4 C3 22.79(15) . . . . ? 
O1 Co1 O4 C3 -157.21(15) 2_767 . . . ? 
O5 Co1 O4 C3 -70.97(15) . . . . ? 
O5 Co1 O4 C3 109.03(15) 2_767 . . . ? 
Co1 O1 C1 O2 160.33(13) . . . . ? 
Co1 O1 C1 C2 -22.8(2) . . . . ? 
O2 C1 C2 C3 -136.02(18) . . . . ? 
O1 C1 C2 C3 47.0(2) . . . . ? 
Co1 O4 C3 O3 170.95(12) . . . . ? 
Co1 O4 C3 C2 -6.8(2) . . . . ? 
C1 C2 C3 O3 150.78(16) . . . . ? 
C1 C2 C3 O4 -31.3(3) . . . . ? 
C8 N2 C4 N1 178.09(17) . . . . ? 
C8 N2 C4 C5 -3.0(3) . . . . ? 
N1 C4 C5 C6 -179.11(18) . . . . ? 
N2 C4 C5 C6 2.0(3) . . . . ? 
C4 C5 C6 C7 -0.2(3) . . . . ? 
C5 C6 C7 C8 -0.7(3) . . . . ? 
C6 C7 C8 N2 -0.1(3) . . . . ? 
C4 N2 C8 C7 2.1(3) . . . . ? 
C13 N4 C9 N3 177.64(18) . . . . ? 
C13 N4 C9 C10 -2.4(3) . . . . ? 
N3 C9 C10 C11 -177.35(19) . . . . ? 
N4 C9 C10 C11 2.7(3) . . . . ? 
C9 C10 C11 C12 -0.8(3) . . . . ? 
C10 C11 C12 C13 -1.4(3) . . . . ? 
C11 C12 C13 N4 1.7(3) . . . . ? 
C9 N4 C13 C12 0.2(3) . . . . ? 
 
loop_ 
 _geom_hbond_atom_site_label_D 
 _geom_hbond_atom_site_label_H 
 _geom_hbond_atom_site_label_A 
 _geom_hbond_distance_DH 
 _geom_hbond_distance_HA 
 _geom_hbond_distance_DA 
 _geom_hbond_angle_DHA 
 _geom_hbond_site_symmetry_A 
O5 H1O5 O2  0.90(3) 1.78(3) 2.6867(19) 178(3) 1_655 
N4 H1N4 O4  0.85(2) 1.93(2) 2.768(2) 169(2) 1_455 
N1 H1N1 O2  0.87(2) 2.10(2) 2.952(2) 169.9(19) 2_667 
N3 H2N3 O3  0.89(3) 1.93(3) 2.818(2) 177(2) 1_455 
N2 H1N2 O1  0.87(2) 1.93(2) 2.788(2) 169(2) 2_667 
N1 H2N1 O7  0.88(3) 2.16(3) 3.001(2) 160(2) 1_545 
O5 H2O5 O6  0.79(3) 2.05(3) 2.839(2) 177(3) . 
O5 H2O5 Cl1  0.79(3) 2.93(3) 3.6677(16) 155(2) . 
N3 H1N3 O8  0.85(2) 2.18(2) 3.024(2) 171(2) 2_666 
 
_diffrn_measured_fraction_theta_max    0.971 
_diffrn_reflns_theta_full              25.00 
_diffrn_measured_fraction_theta_full   0.982 
_refine_diff_density_max    0.423 
_refine_diff_density_min   -0.374 
_refine_diff_density_rms    0.060 
#END
  
data_m20ma 
  
_audit_creation_method            SHELXL-97 
_chemical_name_systematic 
; 
 ? 
; 
_chemical_name_common             ? 
_chemical_melting_point           ? 
_chemical_formula_moiety          'C6 H8 Co O10, 4(C5 H7 N2), 2(F6 P)' 
_chemical_formula_sum 
 'C26 H36 Co F12 N8 O10 P2' 
_chemical_formula_weight          969.50 
  
loop_ 
 _atom_type_symbol 
 _atom_type_description 
 _atom_type_scat_dispersion_real 
 _atom_type_scat_dispersion_imag 
 _atom_type_scat_source 
 'C'  'C'   0.0033   0.0016 
 'International Tables Vol C Tables 4.2.6.8 and 6.1.1.4' 
 'H'  'H'   0.0000   0.0000 
 'International Tables Vol C Tables 4.2.6.8 and 6.1.1.4' 
 'N'  'N'   0.0061   0.0033 
 'International Tables Vol C Tables 4.2.6.8 and 6.1.1.4' 
 'O'  'O'   0.0106   0.0060 
 'International Tables Vol C Tables 4.2.6.8 and 6.1.1.4' 
 'F'  'F'   0.0171   0.0103 
 'International Tables Vol C Tables 4.2.6.8 and 6.1.1.4' 
 'P'  'P'   0.1023   0.0942 
 'International Tables Vol C Tables 4.2.6.8 and 6.1.1.4' 
 'Co'  'Co'   0.3494   0.9721 
 'International Tables Vol C Tables 4.2.6.8 and 6.1.1.4' 
  
_symmetry_cell_setting            Triclinic 
_symmetry_space_group_name_H-M    P-1 
_symmetry_space_group_name_Hall	  -P1 	
  

loop_ 
 _symmetry_equiv_pos_as_xyz 
 'x, y, z' 
 '-x, -y, -z' 
  
_cell_length_a                    7.1433(5) 
_cell_length_b                    11.7421(9) 
_cell_length_c                    11.8894(9) 
_cell_angle_alpha                 84.3130(10) 
_cell_angle_beta                  84.2630(10) 
_cell_angle_gamma                 72.3190(10) 
_cell_volume                      942.90(12) 
_cell_formula_units_Z             1 
_cell_measurement_temperature     100(2) 
_cell_measurement_reflns_used     5178 
_cell_measurement_theta_min       2.42 
_cell_measurement_theta_max       28.31 
  
_exptl_crystal_description        block 
_exptl_crystal_colour             orange 
_exptl_crystal_size_max           0.50 
_exptl_crystal_size_mid           0.50 
_exptl_crystal_size_min           0.20 
_exptl_crystal_density_meas       ? 
_exptl_crystal_density_diffrn     1.707 
_exptl_crystal_density_method     'not measured' 
_exptl_crystal_F_000              493 
_exptl_absorpt_coefficient_mu     0.663 
_exptl_absorpt_correction_type    multi-scan
_exptl_absorpt_correction_T_min   0.8329
_exptl_absorpt_correction_T_max   1.000
_exptl_absorpt_process_details    'SADABS'
  
_exptl_special_details 
; 
 ? 
; 
  
_diffrn_ambient_temperature       100(2) 
_diffrn_radiation_wavelength      0.71073 
_diffrn_radiation_type            MoK\a 
_diffrn_radiation_source          'fine-focus sealed tube' 
_diffrn_radiation_monochromator   graphite 
_diffrn_measurement_device_type   'CCD area detector' 
_diffrn_measurement_method        'phi and omega scans' 
_diffrn_detector_area_resol_mean  ? 
_diffrn_standards_number          ? 
_diffrn_standards_interval_count  ? 
_diffrn_standards_interval_time   ? 
_diffrn_standards_decay_%         ? 
_diffrn_reflns_number             8224 
_diffrn_reflns_av_R_equivalents   0.0204 
_diffrn_reflns_av_sigmaI/netI     0.0277 
_diffrn_reflns_limit_h_min        -9 
_diffrn_reflns_limit_h_max        9 
_diffrn_reflns_limit_k_min        -15 
_diffrn_reflns_limit_k_max        15 
_diffrn_reflns_limit_l_min        -15 
_diffrn_reflns_limit_l_max        15 
_diffrn_reflns_theta_min          1.83 
_diffrn_reflns_theta_max          28.31 
_reflns_number_total              4299 
_reflns_number_gt                 3995 
_reflns_threshold_expression      >2sigma(I) 
  
_computing_data_collection        'Bruker SMART' 
_computing_cell_refinement        'Bruker SMART' 
_computing_data_reduction         'Bruker SAINT' 
_computing_structure_solution     'SHELXS-97 (Sheldrick, 1990)' 
_computing_structure_refinement   'SHELXL-97 (Sheldrick, 1997)' 
_computing_molecular_graphics     'Bruker SHELXTL' 
_computing_publication_material   'Bruker SHELXTL' 
 
_refine_special_details 
; 
 Refinement of F^2^ against ALL reflections.  The weighted R-factor wR and 
 goodness of fit S are based on F^2^, conventional R-factors R are based 
 on F, with F set to zero for negative F^2^. The threshold expression of 
 F^2^ > 2sigma(F^2^) is used only for calculating R-factors(gt) etc. and is 
 not relevant to the choice of reflections for refinement.  R-factors based 
 on F^2^ are statistically about twice as large as those based on F, and R- 
 factors based on ALL data will be even larger. 
; 
 
_refine_ls_structure_factor_coef  Fsqd  
_refine_ls_matrix_type            full 
_refine_ls_weighting_scheme       calc  
_refine_ls_weighting_details 
 'calc w=1/[\s^2^(Fo^2^)+(0.0520P)^2^+0.3115P] where P=(Fo^2^+2Fc^2^)/3' 
_atom_sites_solution_primary      direct 
_atom_sites_solution_secondary    difmap 
_atom_sites_solution_hydrogens    geom 
_refine_ls_hydrogen_treatment     mixed 
_refine_ls_extinction_method      none 
_refine_ls_extinction_coef        ? 
_refine_ls_number_reflns          4299 
_refine_ls_number_parameters      340 
_refine_ls_number_restraints      0 
_refine_ls_R_factor_all           0.0336 
_refine_ls_R_factor_gt            0.0313 
_refine_ls_wR_factor_ref          0.0855 
_refine_ls_wR_factor_gt           0.0837 
_refine_ls_goodness_of_fit_ref    1.035 
_refine_ls_restrained_S_all       1.035 
_refine_ls_shift/su_max           0.001 
_refine_ls_shift/su_mean          0.000 
 
loop_ 
 _atom_site_label 
 _atom_site_type_symbol 
 _atom_site_fract_x 
 _atom_site_fract_y 
 _atom_site_fract_z 
 _atom_site_U_iso_or_equiv 
 _atom_site_adp_type 
 _atom_site_occupancy 
 _atom_site_symmetry_multiplicity 
 _atom_site_calc_flag 
 _atom_site_refinement_flags 
 _atom_site_disorder_assembly 
 _atom_site_disorder_group 
Co1 Co 1.0000 0.5000 1.0000 0.01446(8) Uani 1 2 d S . . 
O1 O 0.71813(14) 0.61230(9) 1.02468(8) 0.0190(2) Uani 1 1 d . . . 
O2 O 0.40051(15) 0.67916(10) 0.99852(9) 0.0214(2) Uani 1 1 d . . . 
O3 O 0.74514(15) 0.44965(10) 0.71579(8) 0.0209(2) Uani 1 1 d . . . 
O4 O 0.92136(14) 0.44495(9) 0.86034(8) 0.0174(2) Uani 1 1 d . . . 
O5 O 1.10731(18) 0.63349(11) 0.90586(10) 0.0267(3) Uani 1 1 d . . . 
H1O5 H 1.195(4) 0.652(2) 0.928(2) 0.038(6) Uiso 1 1 d . . . 
H2O5 H 1.061(3) 0.683(2) 0.8597(19) 0.028(5) Uiso 1 1 d . . . 
C1 C 0.5751(2) 0.63217(12) 0.96255(11) 0.0161(3) Uani 1 1 d . . . 
C2 C 0.6151(2) 0.60535(14) 0.83846(12) 0.0186(3) Uani 1 1 d . . . 
H2 H 0.497(3) 0.6102(19) 0.8078(17) 0.033(5) Uiso 1 1 d . . . 
H2B H 0.659(3) 0.6709(18) 0.8012(17) 0.027(5) Uiso 1 1 d . . . 
C3 C 0.7703(2) 0.49115(12) 0.80280(11) 0.0157(3) Uani 1 1 d . . . 
N1 N 0.60068(19) 0.20381(12) 0.79376(11) 0.0219(3) Uani 1 1 d . . . 
H1N1 H 0.601(3) 0.2334(19) 0.8559(19) 0.027(5) Uiso 1 1 d . . . 
H2N1 H 0.695(3) 0.1371(19) 0.7755(17) 0.029(5) Uiso 1 1 d . . . 
N2 N 0.36566(18) 0.37810(11) 0.73823(11) 0.0183(2) Uani 1 1 d . . . 
H1N2 H 0.344(3) 0.3916(17) 0.8063(17) 0.022(5) Uiso 1 1 d . . . 
C4 C 0.5056(2) 0.27731(13) 0.71029(12) 0.0187(3) Uani 1 1 d . . . 
C5 C 0.5409(2) 0.25303(15) 0.59460(13) 0.0242(3) Uani 1 1 d . . . 
H5 H 0.638(3) 0.1807(19) 0.5768(17) 0.029(5) Uiso 1 1 d . . . 
C6 C 0.4386(3) 0.33475(16) 0.51601(13) 0.0279(3) Uani 1 1 d . . . 
H6 H 0.457(3) 0.318(2) 0.438(2) 0.041(6) Uiso 1 1 d . . . 
C7 C 0.2980(3) 0.44089(16) 0.54793(14) 0.0275(3) Uani 1 1 d . . . 
H7 H 0.226(3) 0.4972(18) 0.4980(17) 0.029(5) Uiso 1 1 d . . . 
C8 C 0.2632(2) 0.46042(14) 0.66006(13) 0.0225(3) Uani 1 1 d . . . 
H8 H 0.172(3) 0.5285(17) 0.6894(16) 0.022(4) Uiso 1 1 d . . . 
N3 N 0.0416(2) 0.23738(14) 0.66314(12) 0.0261(3) Uani 1 1 d . . . 
H1N3 H 0.056(3) 0.210(2) 0.600(2) 0.035(6) Uiso 1 1 d . . . 
H2N3 H -0.041(3) 0.306(2) 0.6744(19) 0.039(6) Uiso 1 1 d . . . 
N4 N 0.09670(19) 0.19998(12) 0.85238(11) 0.0225(3) Uani 1 1 d . . . 
H1N4 H 0.040(3) 0.274(2) 0.8577(17) 0.028(5) Uiso 1 1 d . . . 
C9 C 0.1254(2) 0.16152(14) 0.74672(13) 0.0226(3) Uani 1 1 d . . . 
C10 C 0.2446(2) 0.04252(15) 0.73216(16) 0.0299(4) Uani 1 1 d . . . 
H10 H 0.270(3) 0.019(2) 0.660(2) 0.038(6) Uiso 1 1 d . . . 
C11 C 0.3173(3) -0.02967(16) 0.82390(18) 0.0352(4) Uani 1 1 d . . . 
H11 H 0.391(3) -0.104(2) 0.8133(19) 0.042(6) Uiso 1 1 d . . . 
C12 C 0.2806(3) 0.01261(16) 0.93270(17) 0.0344(4) Uani 1 1 d . . . 
H12 H 0.327(4) -0.036(2) 0.993(2) 0.050(7) Uiso 1 1 d . . . 
C13 C 0.1725(3) 0.12844(16) 0.94443(15) 0.0296(3) Uani 1 1 d . . . 
H13 H 0.148(3) 0.1641(18) 1.0143(17) 0.027(5) Uiso 1 1 d . . . 
P1 P 0.89139(6) 0.85562(3) 0.66031(3) 0.01970(10) Uani 1 1 d . . . 
F1 F 0.87345(15) 0.98960(9) 0.68694(9) 0.0321(2) Uani 1 1 d . . . 
F2 F 0.90983(16) 0.72073(9) 0.63564(10) 0.0373(3) Uani 1 1 d . . . 
F3 F 0.9937(2) 0.87592(11) 0.53869(9) 0.0438(3) Uani 1 1 d . . . 
F6 F 1.10350(16) 0.80880(10) 0.71113(11) 0.0408(3) Uani 1 1 d . . . 
F5 F 0.79271(19) 0.83398(12) 0.78516(9) 0.0457(3) Uani 1 1 d . . . 
F4 F 0.68119(17) 0.89949(11) 0.61175(11) 0.0443(3) Uani 1 1 d . . . 
 
loop_ 
 _atom_site_aniso_label 
 _atom_site_aniso_U_11 
 _atom_site_aniso_U_22 
 _atom_site_aniso_U_33 
 _atom_site_aniso_U_23 
 _atom_site_aniso_U_13 
 _atom_site_aniso_U_12 
Co1 0.01167(13) 0.02032(14) 0.01204(13) -0.00195(10) -0.00223(9) -0.00506(10) 
O1 0.0144(5) 0.0264(5) 0.0160(5) -0.0042(4) -0.0030(4) -0.0045(4) 
O2 0.0140(5) 0.0297(6) 0.0204(5) -0.0069(4) -0.0014(4) -0.0046(4) 
O3 0.0211(5) 0.0275(5) 0.0158(5) -0.0039(4) -0.0045(4) -0.0078(4) 
O4 0.0155(5) 0.0218(5) 0.0152(4) -0.0029(4) -0.0035(4) -0.0047(4) 
O5 0.0232(6) 0.0360(7) 0.0256(6) 0.0128(5) -0.0129(5) -0.0169(5) 
C1 0.0156(6) 0.0177(6) 0.0164(6) -0.0011(5) -0.0025(5) -0.0067(5) 
C2 0.0149(6) 0.0248(7) 0.0151(6) -0.0003(5) -0.0038(5) -0.0040(5) 
C3 0.0147(6) 0.0208(7) 0.0132(6) 0.0006(5) -0.0007(5) -0.0085(5) 
N1 0.0219(6) 0.0231(6) 0.0196(6) -0.0049(5) -0.0015(5) -0.0041(5) 
N2 0.0177(6) 0.0238(6) 0.0150(6) -0.0027(5) -0.0004(5) -0.0084(5) 
C4 0.0165(6) 0.0239(7) 0.0186(6) -0.0033(5) -0.0001(5) -0.0103(5) 
C5 0.0232(7) 0.0308(8) 0.0204(7) -0.0083(6) 0.0029(6) -0.0104(6) 
C6 0.0308(8) 0.0415(9) 0.0160(7) -0.0048(6) 0.0012(6) -0.0176(7) 
C7 0.0277(8) 0.0361(9) 0.0208(7) 0.0051(6) -0.0055(6) -0.0138(7) 
C8 0.0200(7) 0.0257(8) 0.0225(7) 0.0006(6) -0.0023(6) -0.0081(6) 
N3 0.0254(7) 0.0304(7) 0.0229(7) -0.0081(6) -0.0015(5) -0.0072(6) 
N4 0.0222(6) 0.0201(6) 0.0251(6) -0.0037(5) -0.0016(5) -0.0058(5) 
C9 0.0168(7) 0.0259(7) 0.0282(8) -0.0068(6) 0.0000(6) -0.0101(6) 
C10 0.0228(8) 0.0286(8) 0.0407(10) -0.0143(7) -0.0003(7) -0.0080(6) 
C11 0.0262(8) 0.0213(8) 0.0580(12) -0.0073(8) -0.0048(8) -0.0049(7) 
C12 0.0322(9) 0.0276(8) 0.0425(10) 0.0068(8) -0.0086(8) -0.0086(7) 
C13 0.0304(8) 0.0301(8) 0.0284(8) 0.0006(7) -0.0038(7) -0.0095(7) 
P1 0.02265(19) 0.01942(19) 0.01638(18) -0.00150(14) -0.00176(14) -0.00509(15) 
F1 0.0358(5) 0.0227(5) 0.0371(5) -0.0105(4) -0.0015(4) -0.0053(4) 
F2 0.0408(6) 0.0227(5) 0.0512(7) -0.0075(4) -0.0046(5) -0.0117(4) 
F3 0.0657(8) 0.0455(7) 0.0244(5) -0.0093(5) 0.0156(5) -0.0266(6) 
F6 0.0313(5) 0.0310(5) 0.0609(7) 0.0015(5) -0.0205(5) -0.0066(4) 
F5 0.0607(8) 0.0633(8) 0.0224(5) -0.0040(5) 0.0091(5) -0.0356(6) 
F4 0.0339(6) 0.0446(6) 0.0540(7) -0.0071(5) -0.0215(5) -0.0041(5) 
 
_geom_special_details 
; 
 All esds (except the esd in the dihedral angle between two l.s. planes) 
 are estimated using the full covariance matrix.  The cell esds are taken 
 into account individually in the estimation of esds in distances, angles 
 and torsion angles; correlations between esds in cell parameters are only 
 used when they are defined by crystal symmetry.  An approximate (isotropic) 
 treatment of cell esds is used for estimating esds involving l.s. planes. 
; 
 
loop_ 
 _geom_bond_atom_site_label_1 
 _geom_bond_atom_site_label_2 
 _geom_bond_distance 
 _geom_bond_site_symmetry_2 
 _geom_bond_publ_flag 
Co1 O4 2.0274(10) 2_767 ? 
Co1 O4 2.0275(10) . ? 
Co1 O1 2.0555(10) . ? 
Co1 O1 2.0555(10) 2_767 ? 
Co1 O5 2.1232(12) . ? 
Co1 O5 2.1232(12) 2_767 ? 
O1 C1 1.2712(16) . ? 
O2 C1 1.2510(17) . ? 
O3 C3 1.2369(17) . ? 
O4 C3 1.2828(17) . ? 
O5 H1O5 0.80(3) . ? 
O5 H2O5 0.78(2) . ? 
C1 C2 1.5201(19) . ? 
C2 C3 1.524(2) . ? 
C2 H2 0.93(2) . ? 
C2 H2B 0.97(2) . ? 
N1 C4 1.342(2) . ? 
N1 H1N1 0.85(2) . ? 
N1 H2N1 0.89(2) . ? 
N2 C4 1.3428(19) . ? 
N2 C8 1.365(2) . ? 
N2 H1N2 0.83(2) . ? 
C4 C5 1.415(2) . ? 
C5 C6 1.364(2) . ? 
C5 H5 0.95(2) . ? 
C6 C7 1.401(3) . ? 
C6 H6 0.95(2) . ? 
C7 C8 1.361(2) . ? 
C7 H7 0.91(2) . ? 
C8 H8 0.94(2) . ? 
N3 C9 1.326(2) . ? 
N3 H1N3 0.83(2) . ? 
N3 H2N3 0.86(2) . ? 
N4 C9 1.352(2) . ? 
N4 C13 1.363(2) . ? 
N4 H1N4 0.84(2) . ? 
C9 C10 1.415(2) . ? 
C10 C11 1.357(3) . ? 
C10 H10 0.91(2) . ? 
C11 C12 1.403(3) . ? 
C11 H11 0.88(2) . ? 
C12 C13 1.358(3) . ? 
C12 H12 0.90(3) . ? 
C13 H13 0.94(2) . ? 
P1 F4 1.5804(11) . ? 
P1 F3 1.5836(11) . ? 
P1 F1 1.6000(10) . ? 
P1 F2 1.6030(10) . ? 
P1 F6 1.6045(11) . ? 
P1 F5 1.6094(11) . ? 
 
loop_ 
 _geom_angle_atom_site_label_1 
 _geom_angle_atom_site_label_2 
 _geom_angle_atom_site_label_3 
 _geom_angle 
 _geom_angle_site_symmetry_1 
 _geom_angle_site_symmetry_3 
 _geom_angle_publ_flag 
O4 Co1 O4 180.0 2_767 . ? 
O4 Co1 O1 90.60(4) 2_767 . ? 
O4 Co1 O1 89.40(4) . . ? 
O4 Co1 O1 89.40(4) 2_767 2_767 ? 
O4 Co1 O1 90.60(4) . 2_767 ? 
O1 Co1 O1 179.999(1) . 2_767 ? 
O4 Co1 O5 86.62(4) 2_767 . ? 
O4 Co1 O5 93.38(4) . . ? 
O1 Co1 O5 94.06(5) . . ? 
O1 Co1 O5 85.93(5) 2_767 . ? 
O4 Co1 O5 93.38(4) 2_767 2_767 ? 
O4 Co1 O5 86.62(4) . 2_767 ? 
O1 Co1 O5 85.94(5) . 2_767 ? 
O1 Co1 O5 94.07(5) 2_767 2_767 ? 
O5 Co1 O5 180.00(4) . 2_767 ? 
C1 O1 Co1 128.46(9) . . ? 
C3 O4 Co1 130.32(9) . . ? 
Co1 O5 H1O5 119.6(17) . . ? 
Co1 O5 H2O5 131.9(15) . . ? 
H1O5 O5 H2O5 106(2) . . ? 
O2 C1 O1 122.11(13) . . ? 
O2 C1 C2 117.97(12) . . ? 
O1 C1 C2 119.83(12) . . ? 
C1 C2 C3 120.50(12) . . ? 
C1 C2 H2 109.8(13) . . ? 
C3 C2 H2 108.5(13) . . ? 
C1 C2 H2B 104.9(12) . . ? 
C3 C2 H2B 105.9(12) . . ? 
H2 C2 H2B 106.2(17) . . ? 
O3 C3 O4 123.19(13) . . ? 
O3 C3 C2 116.90(12) . . ? 
O4 C3 C2 119.87(12) . . ? 
C4 N1 H1N1 117.6(14) . . ? 
C4 N1 H2N1 118.6(13) . . ? 
H1N1 N1 H2N1 119.8(19) . . ? 
C4 N2 C8 123.14(13) . . ? 
C4 N2 H1N2 117.9(13) . . ? 
C8 N2 H1N2 118.9(13) . . ? 
N1 C4 N2 118.26(13) . . ? 
N1 C4 C5 123.63(14) . . ? 
N2 C4 C5 118.08(14) . . ? 
C6 C5 C4 119.03(15) . . ? 
C6 C5 H5 124.1(12) . . ? 
C4 C5 H5 116.9(12) . . ? 
C5 C6 C7 121.29(15) . . ? 
C5 C6 H6 120.1(14) . . ? 
C7 C6 H6 118.5(14) . . ? 
C8 C7 C6 118.43(15) . . ? 
C8 C7 H7 117.8(13) . . ? 
C6 C7 H7 123.8(13) . . ? 
C7 C8 N2 119.95(15) . . ? 
C7 C8 H8 124.5(12) . . ? 
N2 C8 H8 115.5(11) . . ? 
C9 N3 H1N3 116.3(15) . . ? 
C9 N3 H2N3 122.9(15) . . ? 
H1N3 N3 H2N3 120(2) . . ? 
C9 N4 C13 122.90(14) . . ? 
C9 N4 H1N4 116.1(14) . . ? 
C13 N4 H1N4 120.6(14) . . ? 
N3 C9 N4 118.26(14) . . ? 
N3 C9 C10 124.00(15) . . ? 
N4 C9 C10 117.74(15) . . ? 
C11 C10 C9 119.50(16) . . ? 
C11 C10 H10 123.4(14) . . ? 
C9 C10 H10 117.1(14) . . ? 
C10 C11 C12 121.10(16) . . ? 
C10 C11 H11 118.3(15) . . ? 
C12 C11 H11 120.6(15) . . ? 
C13 C12 C11 118.57(17) . . ? 
C13 C12 H12 120.4(16) . . ? 
C11 C12 H12 121.0(16) . . ? 
C12 C13 N4 120.12(17) . . ? 
C12 C13 H13 123.2(12) . . ? 
N4 C13 H13 116.6(12) . . ? 
F4 P1 F3 91.07(7) . . ? 
F4 P1 F1 90.71(6) . . ? 
F3 P1 F1 90.29(6) . . ? 
F4 P1 F2 89.76(6) . . ? 
F3 P1 F2 90.45(6) . . ? 
F1 P1 F2 179.12(6) . . ? 
F4 P1 F6 178.79(7) . . ? 
F3 P1 F6 89.82(7) . . ? 
F1 P1 F6 90.11(6) . . ? 
F2 P1 F6 89.40(6) . . ? 
F4 P1 F5 90.35(7) . . ? 
F3 P1 F5 178.58(7) . . ? 
F1 P1 F5 89.65(6) . . ? 
F2 P1 F5 89.60(6) . . ? 
F6 P1 F5 88.77(7) . . ? 
 
loop_ 
 _geom_torsion_atom_site_label_1 
 _geom_torsion_atom_site_label_2 
 _geom_torsion_atom_site_label_3 
 _geom_torsion_atom_site_label_4 
 _geom_torsion 
 _geom_torsion_site_symmetry_1 
 _geom_torsion_site_symmetry_2 
 _geom_torsion_site_symmetry_3 
 _geom_torsion_site_symmetry_4 
 _geom_torsion_publ_flag 
O4 Co1 O1 C1 176.29(12) 2_767 . . . ? 
O4 Co1 O1 C1 -3.71(12) . . . . ? 
O1 Co1 O1 C1 147(17) 2_767 . . . ? 
O5 Co1 O1 C1 89.63(12) . . . . ? 
O5 Co1 O1 C1 -90.37(12) 2_767 . . . ? 
O4 Co1 O4 C3 -52(42) 2_767 . . . ? 
O1 Co1 O4 C3 15.36(12) . . . . ? 
O1 Co1 O4 C3 -164.64(12) 2_767 . . . ? 
O5 Co1 O4 C3 -78.67(12) . . . . ? 
O5 Co1 O4 C3 101.33(12) 2_767 . . . ? 
Co1 O1 C1 O2 162.50(10) . . . . ? 
Co1 O1 C1 C2 -21.15(19) . . . . ? 
O2 C1 C2 C3 -141.53(14) . . . . ? 
O1 C1 C2 C3 42.0(2) . . . . ? 
Co1 O4 C3 O3 177.09(10) . . . . ? 
Co1 O4 C3 C2 -0.53(19) . . . . ? 
C1 C2 C3 O3 151.70(13) . . . . ? 
C1 C2 C3 O4 -30.5(2) . . . . ? 
C8 N2 C4 N1 178.42(13) . . . . ? 
C8 N2 C4 C5 -3.2(2) . . . . ? 
N1 C4 C5 C6 -178.85(14) . . . . ? 
N2 C4 C5 C6 2.9(2) . . . . ? 
C4 C5 C6 C7 -0.9(2) . . . . ? 
C5 C6 C7 C8 -0.9(2) . . . . ? 
C6 C7 C8 N2 0.7(2) . . . . ? 
C4 N2 C8 C7 1.4(2) . . . . ? 
C13 N4 C9 N3 178.50(15) . . . . ? 
C13 N4 C9 C10 -1.9(2) . . . . ? 
N3 C9 C10 C11 -177.38(16) . . . . ? 
N4 C9 C10 C11 3.0(2) . . . . ? 
C9 C10 C11 C12 -1.6(3) . . . . ? 
C10 C11 C12 C13 -0.9(3) . . . . ? 
C11 C12 C13 N4 2.1(3) . . . . ? 
C9 N4 C13 C12 -0.7(2) . . . . ? 
 
loop_ 
 _geom_hbond_atom_site_label_D 
 _geom_hbond_atom_site_label_H 
 _geom_hbond_atom_site_label_A 
 _geom_hbond_distance_DH 
 _geom_hbond_distance_HA 
 _geom_hbond_distance_DA 
 _geom_hbond_angle_DHA 
 _geom_hbond_site_symmetry_A 
N3 H1N3 F3  0.83(2) 2.13(2) 2.9238(18) 161(2) 2_666 
O5 H2O5 F5  0.78(2) 2.36(2) 3.0681(19) 152(2) . 
O5 H2O5 F6  0.78(2) 2.24(2) 2.9381(17) 149(2) . 
N1 H2N1 F1  0.89(2) 2.12(2) 2.9828(16) 162.6(18) 1_545 
O5 H1O5 O2  0.80(3) 1.88(3) 2.6737(16) 172(2) 1_655 
N4 H1N4 O4  0.84(2) 1.93(2) 2.7737(17) 176(2) 1_455 
N1 H1N1 O2  0.85(2) 2.10(2) 2.9409(17) 175(2) 2_667 
N3 H2N3 O3  0.86(2) 1.96(2) 2.8155(19) 171(2) 1_455 
N2 H1N2 O1  0.83(2) 2.01(2) 2.8286(16) 167.1(18) 2_667 
 
_diffrn_measured_fraction_theta_max    0.913 
_diffrn_reflns_theta_full              25.00 
_diffrn_measured_fraction_theta_full   0.991 
_refine_diff_density_max    0.502 
_refine_diff_density_min   -0.276 
_refine_diff_density_rms    0.064 
#END
